# Supplementary material
Source: MDPI journal article supplement (https://www.mdpi.com/2073-4395/7/2/44)
Supplement: s1 [file s1]

*Rhizoctonia solani* and Bacterial Inoculants Stimulate Root Exudation of Antifungal Compounds in Lettuce in a Soil-Type Specific Manner

**Saskia Windisch, Sebastian Bott,** [**Marc-Andreas Ohler**](http://community.frontiersin.org/people/Marc-AndreasOhler/131251)**,** [**Hans-Peter Mock**](http://community.frontiersin.org/people/Hans-PeterMock/52012)**, Rico Lippmann,** [**Rita Grosch**](http://community.frontiersin.org/people/RitaGrosch/116326)**,** [**Kornelia Smalla**](http://community.frontiersin.org/people/KorneliaSmalla/19563)**, Uwe Ludewig and Günter Neumann**


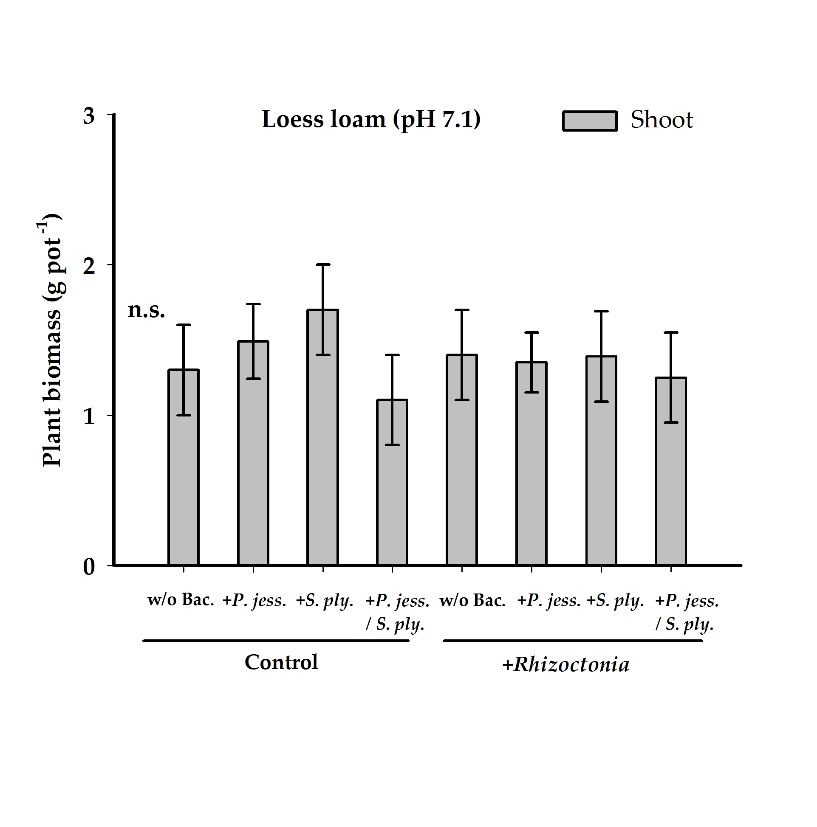


**Figure S1.** Shoot dry mass of *Lactuca sativa* L. cv. Tizian. The plants were grown on loess loam without bacterial inoculation (w/o Bac.), pre-inoculated with *Pseudomonas jessenii* RU47 (*+P. jess.*), *Serratia plymuthica* 3Re-4-18 (*+S. ply.*), a combination of both (*+P. jess/S. ply.*), with and without (Control) subsequent inoculation with *Rhizoctonia solani* AG1-IB (+*Rhizoctonia*). Means ± SE of four independent replicates.


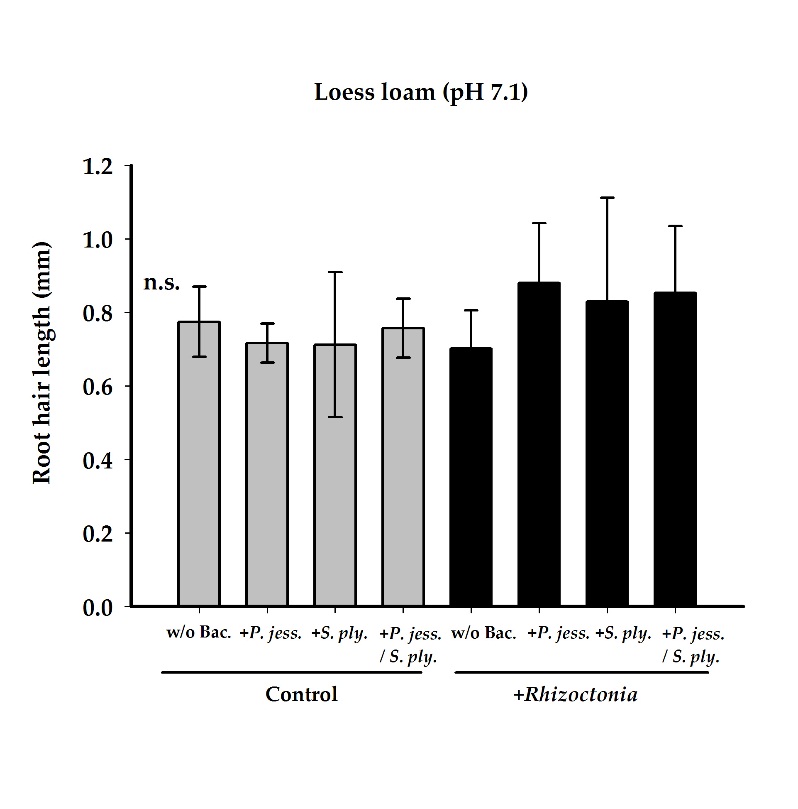


**Figure S2.** Root hair length (mm) of *Lactuca sativa* L. cv. Tizian. The plants were grown on loess loam without bacterial inoculation (w/o Bac.), pre-inoculated with *Pseudomonas jessenii* RU47 (*+P. jess.*), *Serratia plymuthica* 3Re-4-18 (*+S. ply.*), a combination of both (*+P. jess/S. ply.*), with and without (Control) subsequent inoculation with *Rhizoctonia solani* AG1-IB (+*Rhizoctonia*). Means ± SE of four independent replicates.


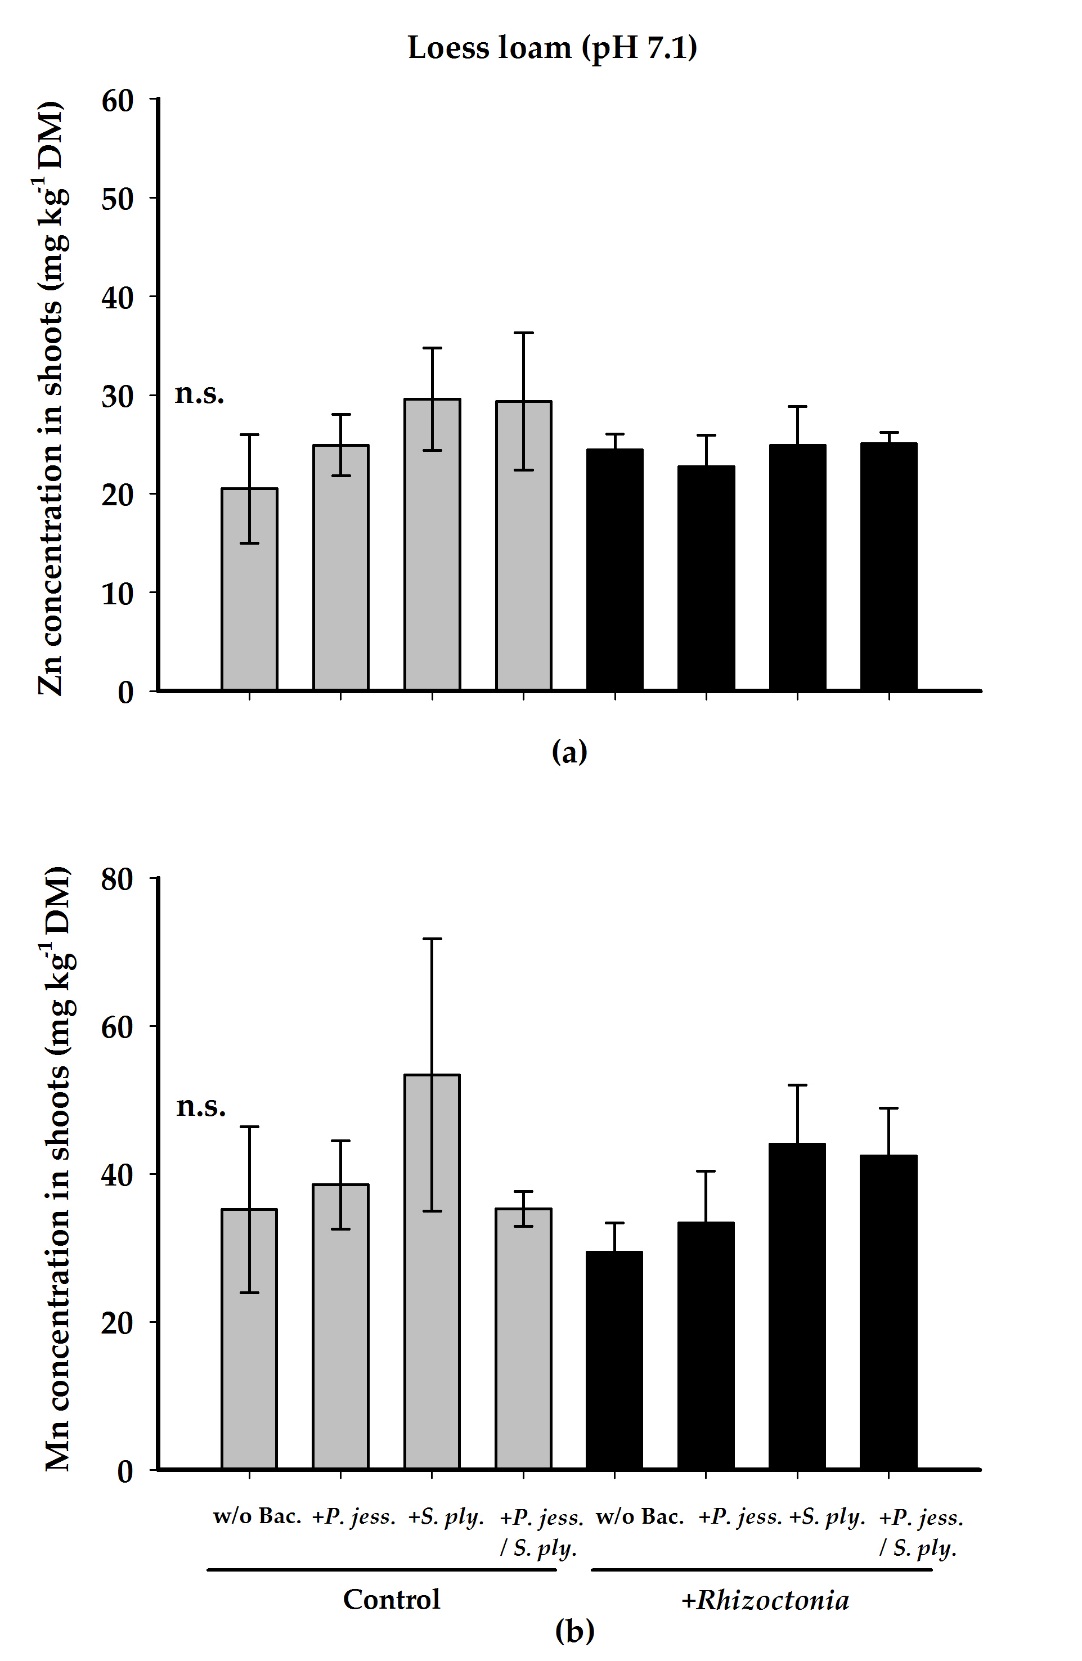


**Figure S3.** Micronutrient concentration of Zn (a) and Mn (b) in shoots (mg kg−1 DM) of *Lactuca sativa* L. cv. Tizian. The plants were grown on loess loam without bacterial inoculation (w/o Bac.), pre-inoculated with *Pseudomonas jessenii* RU47 (*+P. jess.*), *Serratia plymuthica* 3Re-4-18 (*+S. ply.*) a combination of both (*+P. jess/S. ply.*) with and without (Control) subsequent inoculation with *Rhizoctonia solani* AG1-IB (+*Rhizoctonia*). Means ± SE of four independent replicates.


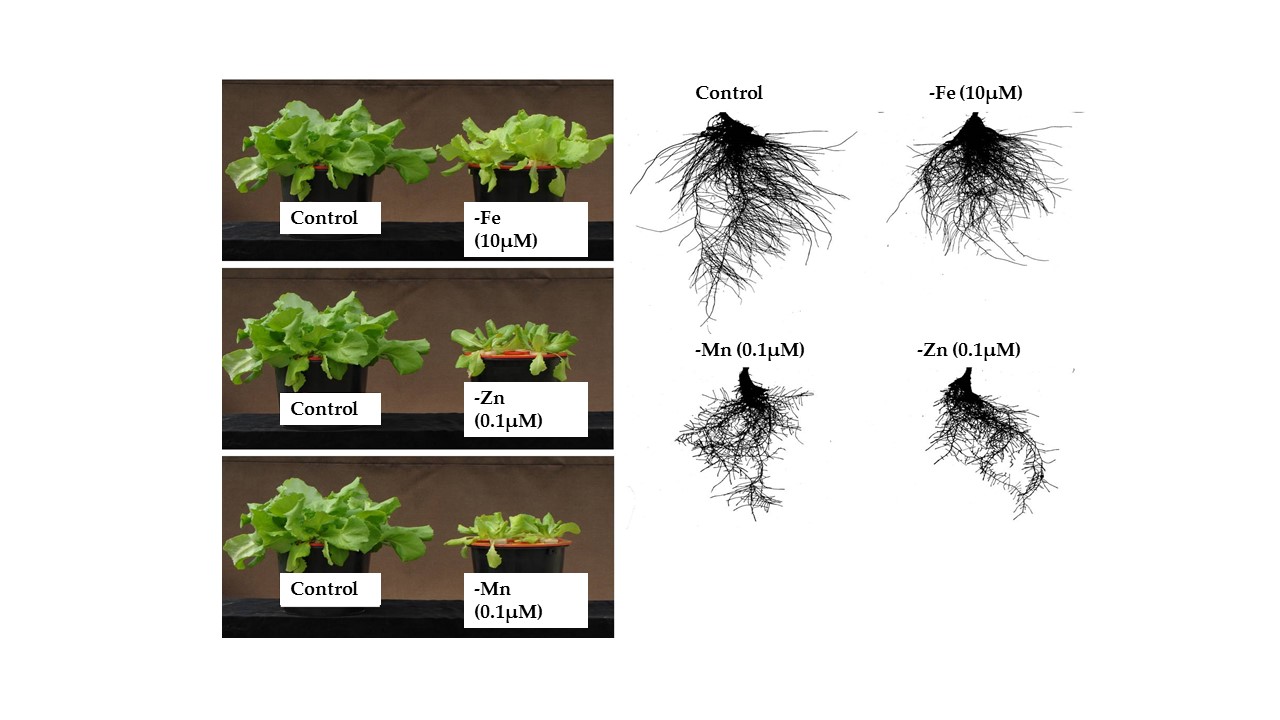


**Figure S4.** Symptoms of micronutrient deficiencies (Zn, Mn, Fe) in *Lactuca sativa* L. cv. Tizian grown in a hydroponic culture system with controlled supply of mineral nutrients: 2 mM Ca (NO3)2, 0.25 mM KH2PO4, 0.7 mM K2SO4, 0.1 mM KCl, 0.5 mM MgSO4, 80 μM/10 µM Fe-EDTA, 10 μM H3BO3, 0.5 μM/0.1 µM ZnSO4, 0.5 µM/0.1 µM MnSO4, 0.2 µM CuSO4 and 0.01 μM (NH4)6Mo7O24.
